# Supplementary material
Source: publisher site journal article supplement (https://www.spandidos-publications.com/5480/downloadSupplementary)
Supplement: Supplementary file 1 [file downloadSupplementary]

Figure S2. KDM3B rescue promotes autophagy. (A) Immunoblot analysis for LC3B expression and lipidation (LC3B-II) and SQSTM1 in different 293T cells. *KDM3B* knockout 293Ts were transiently transfected FLAG-KDM3B plasmid to rescue the *KDM3B* expression. WT, *KDM3B* KO or *KDM3B*-rescued 293T cells were cultured and then starved in EBSS for 4 h. The LC3B-II/LC3B-I ratio was indicated. (B) Reverse transcription-quantitative PCR analysis of *GABARAPL1* in different 293T cells. WT, *KDM3B* KO or *KDM3B*-rescued 293T cells were cultured and then starved in EBSS for 4 h. (C) Immunoblot analysis for the expression levels of *GABARAPL1*, H3K9me2, H4R3me2s in different 293T cells which were cultured in the starvation EBSS medium for 4 h. (D) Immunoblot analysis for the expression levels of *GABARAPL1*, H3K9me2, H4R3me2s in different K562s cultured and then starved in EBSS for 4 h. ns, not significant; \*\*\* $P < 0.001$  and \*\*\*\* $P < 0.0001$ . KDM3B, histone lysine demethylase 3B; WT, wild-type; KO, knockout; *GABARAPL1*, GABA type A receptor-associated protein like 1; EBSS, Earle's Balanced Salt Solution.

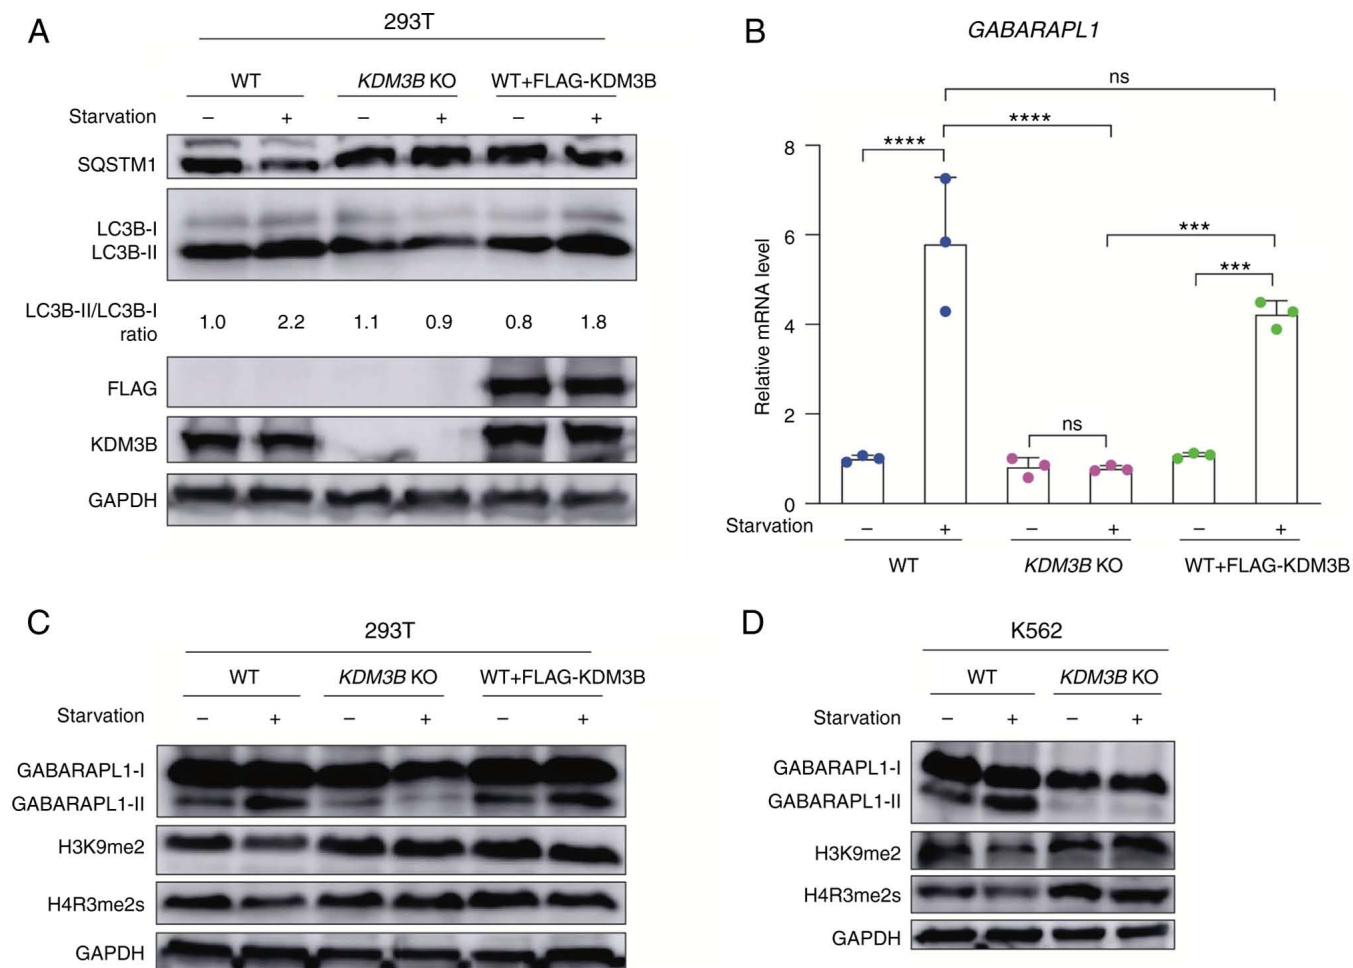

Figure S3. Survival outcomes, expression differences and correlation analysis detected by gene expression. (A and B) Kaplan-Meier overall survival curves were measured based on *KDM3B* and *GABARAPL1* levels. (C) Differential expression of *KDM3B* and *GABARAPL1* in healthy populations (normal) and patients with acute myeloid leukemia (tumor). (D) The correlation between *KDM3B* and *GABARAPL1* was analyzed by Spearman's correlation analysis. *KDM3B*, histone lysine demethylase 3B; *GABARAPL1*, GABA type A receptor-associated protein like 1. \* $P < 0.05$  and \*\*\* $P < 0.001$ .

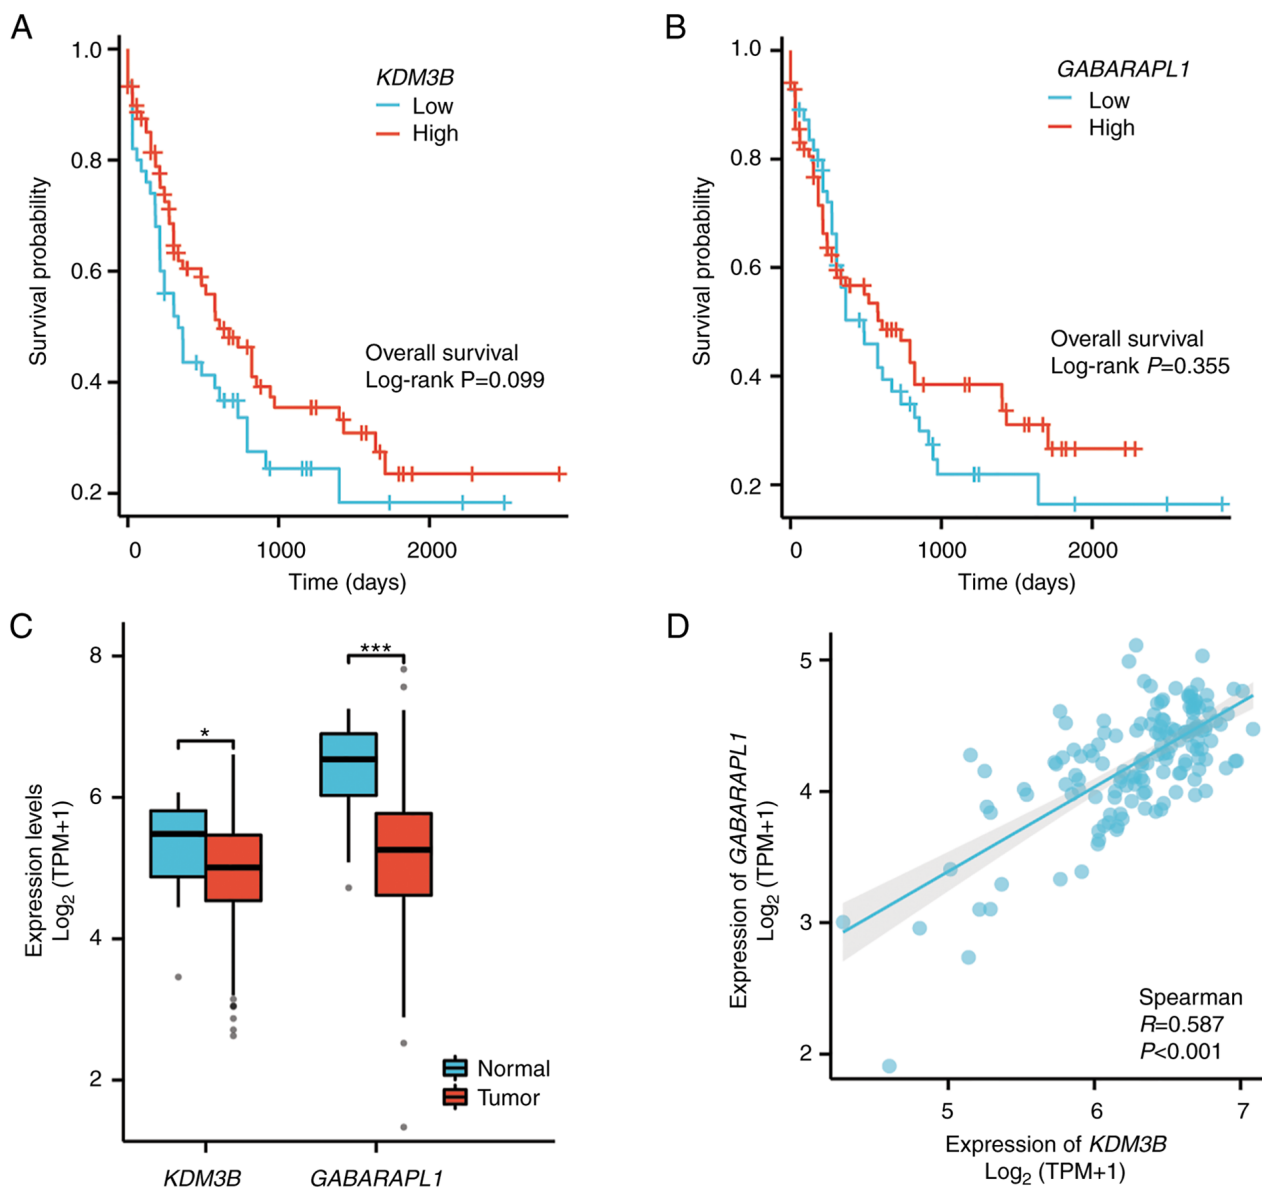

Figure S4. The univariate and multivariate Cox regression model analyses for assessment of the relationship between KDM3B, GABARAPL1 expression levels and acute myeloid leukemia clinical phenotypes. KDM3B, histone lysine demethylase 3B; GABARAPL1, GABA type A receptor-associated protein like 1.

| Characteristics                 | Total (N) | Univariate analysis   |                   | Multivariate analysis |                   |
|---------------------------------|-----------|-----------------------|-------------------|-----------------------|-------------------|
|                                 |           | Hazard ratio (95% CI) | P value           | Hazard ratio (95% CI) | P value           |
| Gender                          | 139       |                       | 0.912             |                       |                   |
| Female                          | 62        | Reference             |                   |                       |                   |
| Male                            | 77        | 1.024 (0.671-1.564)   | 0.912             |                       |                   |
| Age                             | 139       |                       | <b>&lt; 0.001</b> |                       |                   |
| ≤60                             | 78        | Reference             |                   | Reference             |                   |
| >60                             | 61        | 3.321 (2.156-5.116)   | <b>&lt; 0.001</b> | 3.017 (1.893-4.807)   | <b>&lt; 0.001</b> |
| FAB classifications             | 138       |                       | <b>0.017</b>      |                       |                   |
| M0&M1&M2                        | 78        | Reference             |                   | Reference             |                   |
| M3                              | 14        | 0.281 (0.101-0.785)   | <b>0.015</b>      | 0.576 (0.170-1.951)   | 0.376             |
| M4                              | 28        | 1.106 (0.656-1.865)   | 0.705             | 1.228 (0.707-2.134)   | 0.466             |
| M5                              | 15        | 1.731 (0.870-3.446)   | 0.118             | 2.287 (1.118-4.679)   | <b>0.024</b>      |
| M6                              | 2         | 2.402 (0.576-10.010)  | 0.229             | 2.364 (0.564-9.916)   | 0.240             |
| M7                              | 1         | 2.178 (0.298-5.939)   | 0.443             | 1.320 (0.177-9.861)   | 0.787             |
| Cytogenetic risk                | 137       |                       | <b>&lt; 0.001</b> |                       |                   |
| Favorable                       | 30        | Reference             |                   | Reference             |                   |
| Intermediate/normal             | 76        | 2.934 (1.487-5.791)   | <b>0.002</b>      | 1.744 (0.769-3.953)   | 0.183             |
| Poor                            | 31        | 4.124 (1.927-8.823)   | <b>&lt; 0.001</b> | 2.038 (0.814-5.104)   | 0.129             |
| Cytogenetics                    | 125       |                       | 0.103             |                       |                   |
| Normal                          | 64        | Reference             |                   |                       |                   |
| Complex                         | 22        | 1.044 (0.562-1.940)   | 0.891             |                       |                   |
| t(15;17)&t(8;21)&inv(16)        | 25        | 0.452 (0.227-0.901)   | <b>0.024</b>      |                       |                   |
| +8&t(9;11)                      | 8         | 1.166 (0.495-2.745)   | 0.726             |                       |                   |
| del(5)&del(7)                   | 6         | 1.344 (0.530-3.413)   | 0.533             |                       |                   |
| WBC count (×10 <sup>9</sup> /L) | 138       |                       | 0.504             |                       |                   |
| ≤20                             | 74        | Reference             |                   |                       |                   |
| >20                             | 64        | 1.156 (0.757-1.764)   | 0.503             |                       |                   |
| BM blasts (%)                   | 139       |                       | 0.500             |                       |                   |
| ≤20                             | 58        | Reference             |                   |                       |                   |
| >20                             | 81        | 1.159 (0.754-1.780)   | 0.502             |                       |                   |
| PB blasts (%)                   | 139       |                       | 0.348             |                       |                   |
| ≤20                             | 65        | Reference             |                   |                       |                   |
| >20                             | 74        | 1.224 (0.802-1.869)   | 0.349             |                       |                   |
| <i>KDM3B</i>                    | 139       | 0.711 (0.472-1.070)   | 0.102             |                       |                   |
| <i>GABARAPL1</i>                | 139       | 0.944 (0.767-1.163)   | 0.591             |                       |                   |

WBC, white blood cell; BM, bone marrow; PB, peripheral blood

Figure S5. Logistic regression analysis for the relationship between acute myeloid leukemia clinical phenotypes and KDM3B, GABARAPL1 expression. KDM3B, histone lysine demethylase 3B; GABARAPL1, GABA type A receptor-associated protein like 1.

| Characteristics                                                                                    | Total (N) | <i>KDM3B</i>        |              | <i>GABARAPL1</i>    |                   |
|----------------------------------------------------------------------------------------------------|-----------|---------------------|--------------|---------------------|-------------------|
|                                                                                                    |           | Odds ratio (95% CI) | P value      | Odds ratio (95% CI) | P value           |
| Gender (Male vs. Female)                                                                           | 150       | 1.176 (0.617-2.240) | 0.622        | 1.055 (0.554-2.009) | 0.870             |
| Age (>60 vs. ≤60)                                                                                  | 150       | 0.947 (0.495-1.811) | 0.869        | 1.641 (0.853-3.156) | 0.138             |
| FAB classifications<br>(M3&M4&M5 vs. M0&M1&M2)                                                     | 146       | 0.423 (0.214-0.835) | <b>0.013</b> | 3.421 (1.703-6.874) | <b>&lt; 0.001</b> |
| Cytogenetics<br>(Complex &<br>t(15;17)&t(8;21)&inv(16)<br>&+8&t(9;11)&del(5)&del(7)<br>vs. Normal) | 134       | 0.654 (0.331-1.294) | 0.223        | 1.341 (0.679-2.647) | 0.398             |
| Cytogenetic risk<br>(Poor vs. Favorable &<br>Intermediate/normal)                                  | 148       | 0.745 (0.350-1.584) | 0.444        | 0.572 (0.266-1.230) | 0.152             |
| WBC count (×10 <sup>9</sup> /L) (>20 vs. ≤20)                                                      | 149       | 0.744 (0.391-1.417) | 0.369        | 0.566 (0.296-1.084) | 0.086             |
| BM blasts (%) (>20 vs. ≤20)                                                                        | 150       | 1.323 (0.686-2.552) | 0.404        | 0.262 (0.130-0.562) | <b>&lt; 0.001</b> |
| PB blasts (%) (>20 vs. ≤20)                                                                        | 150       | 0.616 (0.323-1.176) | 0.142        | 0.948 (0.499-1.800) | 0.870             |
| <i>NPM1</i> mutation (Positive vs. Negative)                                                       | 149       | 0.586 (0.267-1.288) | 0.184        | 1.242 (0.572-2.699) | 0.584             |
| <i>FLT3</i> mutation (Positive vs. Negative)                                                       | 146       | 0.754 (0.372-1.527) | 0.433        | 0.938 (0.464-1.894) | 0.858             |
